# Supplementary material
Source: HighWire-hosted journal article supplement (https://cmajopen.ca/highwire/filestream/81259/field_highwire_adjunct_files/3/2018-0097-STROBE-checklist.pdf)
Supplement: 2018-0097-STROBE-checklist.pdf [file 2018-0097-STROBE-checklist.pdf]

Trends in Healthcare Utilization and Costs at the End of Life: A population-based observational study

STROBE Statement—checklist of items that should be included in reports of observational studies

|                              | <b>Item No</b> | <b>Recommendation</b>                                                                                                                                                                                                                                                                                                                                                                                                                                                  | <b>Authors check</b>                                     |
|------------------------------|----------------|------------------------------------------------------------------------------------------------------------------------------------------------------------------------------------------------------------------------------------------------------------------------------------------------------------------------------------------------------------------------------------------------------------------------------------------------------------------------|----------------------------------------------------------|
| <b>Title and abstract</b>    | 1              | (a) Indicate the study’s design with a commonly used term in the title or the abstract                                                                                                                                                                                                                                                                                                                                                                                 | Included in the title and abstract                       |
|                              |                | (b) Provide in the abstract an informative and balanced summary of what was done and what was found                                                                                                                                                                                                                                                                                                                                                                    | Included in the abstract                                 |
| <b>Introduction</b>          |                |                                                                                                                                                                                                                                                                                                                                                                                                                                                                        |                                                          |
| Background/rationale         | 2              | Explain the scientific background and rationale for the investigation being reported                                                                                                                                                                                                                                                                                                                                                                                   | See “Introduction” section –Pg. 1                        |
| Objectives                   | 3              | State specific objectives, including any prespecified hypotheses                                                                                                                                                                                                                                                                                                                                                                                                       | See “Introduction” section – Pg. 1 (last paragraph)      |
| <b>Methods</b>               |                |                                                                                                                                                                                                                                                                                                                                                                                                                                                                        |                                                          |
| Study design                 | 4              | Present key elements of study design early in the paper                                                                                                                                                                                                                                                                                                                                                                                                                | Abstract and “Methods” section (Pg. 2 – first paragraph) |
| Setting                      | 5              | Describe the setting, locations, and relevant dates, including periods of recruitment, exposure, follow-up, and data collection                                                                                                                                                                                                                                                                                                                                        | Abstract and “Methods” section - Pg. 2                   |
| Participants                 | 6              | (a) <i>Cohort study</i> —Give the eligibility criteria, and the sources and methods of selection of participants. Describe methods of follow-up<br><i>Case-control study</i> —Give the eligibility criteria, and the sources and methods of case ascertainment and control selection. Give the rationale for the choice of cases and controls<br><i>Cross-sectional study</i> —Give the eligibility criteria, and the sources and methods of selection of participants | “Methods” section Pg. 2-3                                |
|                              |                | (b) <i>Cohort study</i> —For matched studies, give matching criteria and number of exposed and unexposed<br><i>Case-control study</i> —For matched studies, give matching criteria and the number of controls per case                                                                                                                                                                                                                                                 | NA                                                       |
| Variables                    | 7              | Clearly define all outcomes, exposures, predictors, potential confounders, and effect modifiers. Give diagnostic criteria, if applicable                                                                                                                                                                                                                                                                                                                               | “Variables” section - Pg. 3-5                            |
| Data sources/<br>measurement | 8*             | For each variable of interest, give sources of data and details of methods of assessment (measurement). Describe comparability of assessment methods if there is more than one group                                                                                                                                                                                                                                                                                   | Methods - “Design and Setting” section. Pg 3 - 5         |
| Bias                         | 9              | Describe any efforts to address potential sources of bias                                                                                                                                                                                                                                                                                                                                                                                                              | Statistical Analysis” section – Pg 5                     |

Trends in Healthcare Utilization and Costs at the End of Life: A population-based observational study

|                        |    |                                                                                                                                                                                                                                                                                                           |                                            |
|------------------------|----|-----------------------------------------------------------------------------------------------------------------------------------------------------------------------------------------------------------------------------------------------------------------------------------------------------------|--------------------------------------------|
| Study size             | 10 | Explain how the study size was arrived at                                                                                                                                                                                                                                                                 | “Methods” section Pg. 3                    |
| Quantitative variables | 11 | Explain how quantitative variables were handled in the analyses. If applicable, describe which groupings were chosen and why                                                                                                                                                                              | “Variables” section - Pg. 4-5              |
| Statistical methods    | 12 | (a) Describe all statistical methods, including those used to control for confounding                                                                                                                                                                                                                     | Statistical Analysis” section – Pg 5       |
|                        |    | (b) Describe any methods used to examine subgroups and interactions                                                                                                                                                                                                                                       | NA                                         |
|                        |    | (c) Explain how missing data were addressed                                                                                                                                                                                                                                                               | Missing data referenced in Table footnotes |
|                        |    | (d) <i>Cohort study</i> —If applicable, explain how loss to follow-up was addressed<br><i>Case-control study</i> —If applicable, explain how matching of cases and controls was addressed<br><i>Cross-sectional study</i> —If applicable, describe analytical methods taking account of sampling strategy | NA                                         |
|                        |    | (e) Describe any sensitivity analyses                                                                                                                                                                                                                                                                     | NA                                         |

Continued on next page

Trends in Healthcare Utilization and Costs at the End of Life: A population-based observational study

| <b>Results</b>    |     | <b>Authors check</b>                                                                                                                                                                                         |                                                                                              |
|-------------------|-----|--------------------------------------------------------------------------------------------------------------------------------------------------------------------------------------------------------------|----------------------------------------------------------------------------------------------|
| Participants      | 13* | (a) Report numbers of individuals at each stage of study—eg numbers potentially eligible, examined for eligibility, confirmed eligible, included in the study, completing follow-up, and analysed            | Results section – Pg.6                                                                       |
|                   |     | (b) Give reasons for non-participation at each stage                                                                                                                                                         | NA                                                                                           |
|                   |     | (c) Consider use of a flow diagram                                                                                                                                                                           | NA                                                                                           |
| Descriptive data  | 14* | (a) Give characteristics of study participants (eg demographic, clinical, social) and information on exposures and potential confounders                                                                     | “Patterns and Temporal Trends in Place of Death” section – Pg.6                              |
|                   |     | (b) Indicate number of participants with missing data for each variable of interest                                                                                                                          | See Table 1                                                                                  |
|                   |     | (c) <i>Cohort study</i> —Summarise follow-up time (eg, average and total amount)                                                                                                                             | NA                                                                                           |
| Outcome data      | 15* | <i>Cohort study</i> —Report numbers of outcome events or summary measures over time                                                                                                                          | “Results section” – Pg.6-9. With sub-headings for each outcome. Tables 3-4, Figures 1 and 2. |
|                   |     | <i>Case-control study</i> —Report numbers in each exposure category, or summary measures of exposure                                                                                                         |                                                                                              |
|                   |     | <i>Cross-sectional study</i> —Report numbers of outcome events or summary measures                                                                                                                           |                                                                                              |
| Main results      | 16  | (a) Give unadjusted estimates and, if applicable, confounder-adjusted estimates and their precision (eg, 95% confidence interval). Make clear which confounders were adjusted for and why they were included | Table 2                                                                                      |
|                   |     | (b) Report category boundaries when continuous variables were categorized                                                                                                                                    | Shown in applicable tables                                                                   |
|                   |     | (c) If relevant, consider translating estimates of relative risk into absolute risk for a meaningful time period                                                                                             | NA                                                                                           |
| Other analyses    | 17  | Report other analyses done—eg analyses of subgroups and interactions, and sensitivity analyses                                                                                                               | “Results” – section Pg. 6 -9; supplemental tables and figures.                               |
| <b>Discussion</b> |     |                                                                                                                                                                                                              |                                                                                              |
| Key results       | 18  | Summarise key results with reference to study objectives                                                                                                                                                     | Paragraph 1 of “Discussion section” - Pg. 9                                                  |
| Limitations       | 19  | Discuss limitations of the study, taking into account sources of potential bias or imprecision. Discuss both direction and magnitude of any potential bias                                                   | “Limitations” section Pg. 13                                                                 |

## Trends in Healthcare Utilization and Costs at the End of Life: A population-based observational study

|                |    |                                                                                                                                                                            |                               |
|----------------|----|----------------------------------------------------------------------------------------------------------------------------------------------------------------------------|-------------------------------|
| Interpretation | 20 | Give a cautious overall interpretation of results considering objectives, limitations, multiplicity of analyses, results from similar studies, and other relevant evidence | “Conclusion” section - Pg. 14 |
|----------------|----|----------------------------------------------------------------------------------------------------------------------------------------------------------------------------|-------------------------------|

---

|                  |    |                                                                       |                              |
|------------------|----|-----------------------------------------------------------------------|------------------------------|
| Generalisability | 21 | Discuss the generalisability (external validity) of the study results | “Limitations” section Pg. 13 |
|------------------|----|-----------------------------------------------------------------------|------------------------------|

---

### **Other information**

---

|         |    |                                                                                                                                                               |                                     |
|---------|----|---------------------------------------------------------------------------------------------------------------------------------------------------------------|-------------------------------------|
| Funding | 22 | Give the source of funding and the role of the funders for the present study and, if applicable, for the original study on which the present article is based | Funding statement included – Pg. 16 |
|---------|----|---------------------------------------------------------------------------------------------------------------------------------------------------------------|-------------------------------------|

\*Give information separately for cases and controls in case-control studies and, if applicable, for exposed and unexposed groups in cohort and cross-sectional studies.
